# Supplementary material for: Genetic Variants in the Mitochondrial Thymidylate Biosynthesis Pathway Increase Colorectal Cancer Risk
Source: MDPI journal article supplement (doi:10.3390/curroncol30090583), 2023-08-30
Supplement: s1 [file s1]

### Supplementary file (Electrophoresis images and in-silico analysis)

**Manuscript ID:** curroncol-2432755

**Manuscript title:** Genetic variants in the mitochondrial thymidylate biosynthesis pathway increase colorectal cancer risk

**Authors:** Entesar M. Arrait, Ayat B. Al-Ghafari, Huda A. Al Doghaither

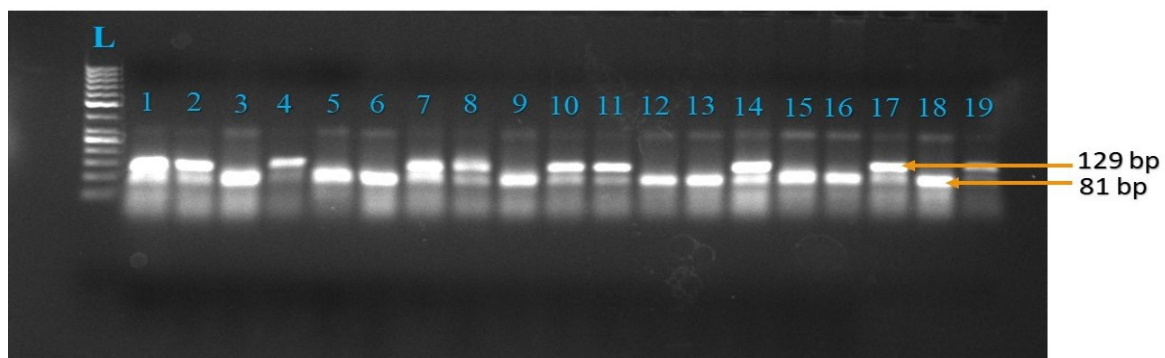

**Figure S1.** Lys27Gln variant genotyping in *CDA* gene. The PCR product size for this variant was 129 bp. These fragments were digested by *MboII* restricted enzyme, yielding the following: the amplicon of wild type (AA) genotype yielded two bands with sizes 81 and 48 bp (lanes 3, 5, 6, 9, 12, 13, 15, 16, and 18), the heterozygous (AC) genotype yielded three bands with sizes 129, 81 and 48 bp (lanes 1, 2, 4, 7, 8, 10, 11, 14, 17, and 19) and the homozygous (CC) genotype produced a band with a size 129 bp (lane 4). As shown from image, a size of 48 bp was difficult to be determined on 2% agarose gel while only two sizes 129 and 81 bp can be seen clearly.

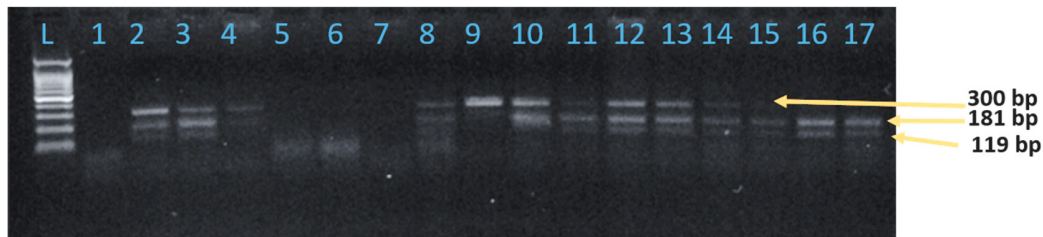

**Figure S2.** Ala70Thr variant genotyping in *CDA* gene. The PCR product size for the variant was 300 bp. These fragments were digested by *CpoI* restricted enzyme, yielding the following on 2% agarose gel: the amplicon of wild type (GG) genotype yielded two fragments with sizes 181 and 119 bp (lanes 16 and 17), the heterozygous (GA) genotype yielded three fragments with sizes 300, 181 and 119 bp (lanes 2, 3, 4, 8, 10, 11, 12, 13, 14, and 15) and the homozygous (AA) genotype produced a fragment with a size 300 bp (lane 9).

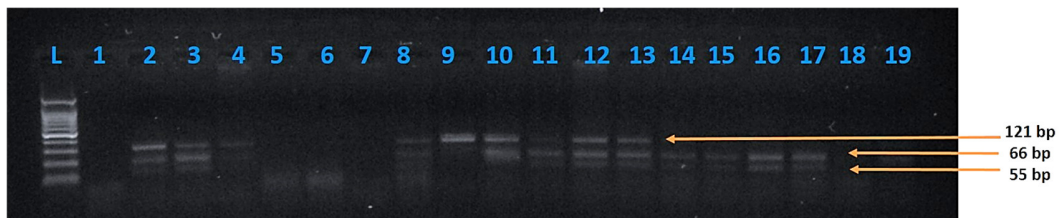

**Figure S3.** S471L variant genotyping in *TP* gene. The PCR product size for this variant was 121 bp. These fragments were digested by *MnII* restricted enzyme, yielding the following on 2% agarose gel: the amplicon of wild type (CC) genotype yielded two fragments with sizes 66 and 55 bp (lanes 14-19), the heterozygous (CT) genotype yielded three fragments with sizes 121, 66 and 55 bp (lanes 2, 3, 8, 10, 11, 12, and 13) and the homozygous (TT) genotype produced a fragment with a size 121 bp (lane 9).

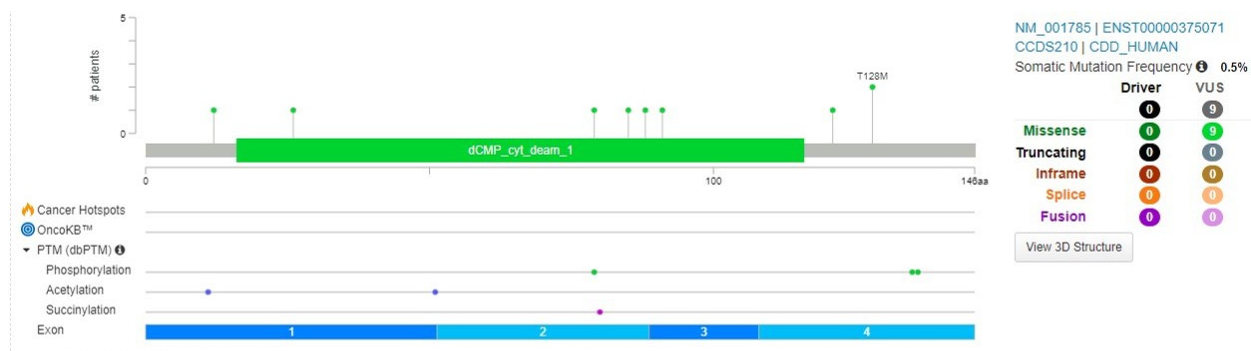

**Figure S4.** The distribution of the major cytidine deaminase (CDA) mutations in colorectal cancer (CRC) human samples. The image was obtained from cBioPortal for Cancer Genomics showing the major nine mutations in *CDA* gene among (n=1774 samples in 12 projects, and somatic mutation frequency 0.5%) and their locations on the gene exons. However, none of the nine missense mutations (M91V, T128M, A88T, K26N, I85T, D121Y, T128M, P12L, and Y79H) were considered as CRC hotspots.

**Table S1.** In-silico analysis of the major cytidine deaminase (CDA) mutations in colorectal cancer (CRC) human samples (cBioPortal for Cancer genomics).

| Protein Change | Mutation Type | Variant Type | Chromosome | HGVSg           | HGVSc                      | Exon | dbSNP        |
|----------------|---------------|--------------|------------|-----------------|----------------------------|------|--------------|
| M91V           | Missense      | SNP          | 1          | 1:g.20940339A>G | ENST00000375071.3:c.271A>G | 3    |              |
| T128M          | Missense      | SNP          | 1          | 1:g.20945003C>T | ENST00000375071.3:c.383C>T | 4    | rs139287750  |
| A88T           | Missense      | SNP          | 1          | 1:g.20931528G>A | ENST00000375071.3:c.262G>A | 2    | rs150100090  |
| K26N           | Missense      | SNP          | 1          | 1:g.20915700G>T | ENST00000375071.3:c.78G>T  | 1    | rs17854868   |
| I85T           | Missense      | SNP          | 1          | 1:g.20931520T>C | ENST00000375071.3:c.254T>C | 2    | rs2154532417 |
| D121Y          | Missense      | SNP          | 1          | 1:g.20944981G>T | ENST00000375071.3:c.361G>T | 4    |              |
| T128M          | Missense      | SNP          | 1          | 1:g.20945003C>T | ENST00000375071.3:c.383C>T | 4    | rs139287750  |
| P12L           | Missense      | SNP          | 1          | 1:g.20915657C>T | ENST00000375071.3:c.35C>T  | 1    | rs2101170695 |
| Y79H           | Missense      | SNP          | 1          | 1:g.20931501T>C | ENST00000375071.3:c.235T>C | 2    | rs2154532408 |

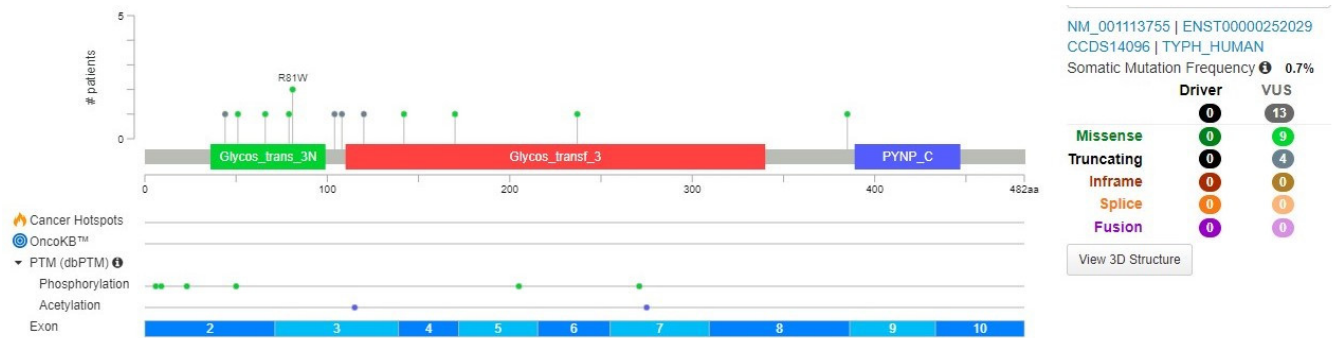

**Figure S5.** The distribution of the major thymidine phosphorylase (TP) mutations in colorectal cancer (CRC) human samples. The image was obtained from cBioPortal for Cancer Genomics showing the major 12 mutations in *TP* gene among (n=1774 samples in 12 projects, and somatic mutation frequency 0.7%) and their locations on the gene exons. Those mutations are classified as follows: [eight missense mutations (R81W, P170Q, A66V, G237R, M142I, E51K, R79Q, and A385T); three nonsense mutations (R44\*, W108\*, and W104\*), and one frame shift deletion (G120Vfs\*23). However, none of these mutations were considered as CRC hotspots.

**Table S2.** In-silico analysis of the major thymidine phosphorylase (TP) mutations in colorectal cancer (CRC) human samples (cBioPortal for Cancer genomics).

| Protein Change | Mutation Type        | Variant Type | Chromosome | HGVSc            | HGVSc                       | Exon | dbSNP        |
|----------------|----------------------|--------------|------------|------------------|-----------------------------|------|--------------|
| R81W           | Missense             | SNP          | 22         | 22:g.50967741G>A | ENST00000252029.3:c.241C>T  | 3    |              |
| R81W           | Missense             | SNP          | 22         | 22:g.50967741G>A | ENST00000252029.3:c.241C>T  | 3    |              |
| R44*           | Nonsense             | SNP          | 22         | 22:g.50968009G>A | ENST00000252029.3:c.130C>T  | 2    |              |
| P170Q          | Missense             | SNP          | 22         | 22:g.50966948G>T | ENST00000252029.3:c.509C>A  | 4    |              |
| A66V           | Missense             | SNP          | 22         | 22:g.50967942G>A | ENST00000252029.3:c.197C>T  | 2    | rs2069514092 |
| G237R          | Missense             | SNP          | 22         | 22:g.50965650C>T | ENST00000252029.3:c.709G>A  | 6    |              |
| M142I          | Missense             | SNP          | 22         | 22:g.50967031C>T | ENST00000252029.3:c.426G>A  | 4    |              |
| E51K           | Missense             | SNP          | 22         | 22:g.50967988C>T | ENST00000252029.3:c.151G>A  | 2    | rs768461642  |
| G120Vfs*23     | Frame_Shift_Deletion | DEL          | 22         | 22:g.50967623del | ENST00000252029.3:c.359del  | 3    |              |
| R79Q           | Missense             | SNP          | 22         | 22:g.50967746C>T | ENST00000252029.3:c.236G>A  | 3    | rs751450304  |
| W108*          | Nonsense             | SNP          | 22         | 22:g.50967658C>T | ENST00000252029.3:c.324G>A  | 3    |              |
| W104*          | Nonsense             | SNP          | 22         | 22:g.50967670C>T | ENST00000252029.3:c.312G>A  | 3    |              |
| A385T          | Missense             | SNP          | 22         | 22:g.50964681C>T | ENST00000252029.3:c.1153G>A | 8    | rs1253283946 |

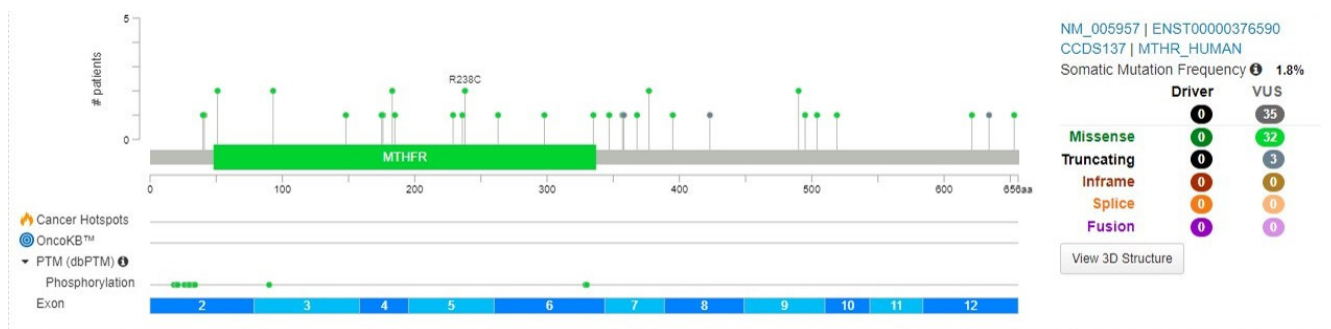

**Figure S6.** The distribution of the major 5,10-methylenetetrahydrofolate reductase (MTHFR) mutations in colorectal cancer (CRC) human samples. The image was obtained from cBioPortal for Cancer Genomics showing the major 35 mutations in *MTHFR* gene among (n=1774 samples in 12 projects, and somatic mutation frequency 1.8%) and their locations on the gene exons. Those mutations are classified as follows: [32 missense mutations (G490R, R183Q, R377H, R377C, F236L, R238C, R519C, P395S, R41Q, A175T, V93G, V93L, D495N, R335C, G298D, A368S, H263Q, G490R, V176A, L148R, R357H, R51Q, L229P, R183Q, E40K, R51W, R238C, G504R, L621P, L347I, E185D, and T653M); two nonsense mutations (R358\* and Q634\*), and one frame shift deletion (E423Rfs\*3). However, none of these mutations were considered as CRC hotspots.

**Table S3.** In-silico analysis of the major 5,10-methylenetetrahydrofolate reductase (MTHFR) mutations in colorectal cancer (CRC) human samples (cBioPortal for Cancer genomics).

| Protein Change | Mutation Type        | Variant Type | Chromosome | HGVSc           | HGVSc                       | Exon | dbSNP        |
|----------------|----------------------|--------------|------------|-----------------|-----------------------------|------|--------------|
| G490R          | Missense             | SNP          | 1          | 1:g.11854026C>T | ENST00000376590.3:c.1468G>A | 9    | rs760349899  |
| R183Q          | Missense             | SNP          | 1          | 1:g.11860307C>T | ENST00000376590.3:c.548G>A  | 4    | rs574132670  |
| R377H          | Missense             | SNP          | 1          | 1:g.11854822C>T | ENST00000376590.3:c.1130G>A | 7    | rs750323424  |
| R377C          | Missense             | SNP          | 1          | 1:g.11854823G>A | ENST00000376590.3:c.1129C>T | 7    | rs121434296  |
| F236L          | Missense             | SNP          | 1          | 1:g.11856335G>T | ENST00000376590.3:c.708C>A  | 5    | rs34279942   |
| E423Rfs*3      | Frame_Shift_Deletion | DEL          | 1          | 1:g.11854495del | ENST00000376590.3:c.1267del | 8    |              |
| R238C          | Missense             | SNP          | 1          | 1:g.11856331G>A | ENST00000376590.3:c.712C>T  | 5    | rs377571071  |
| R519C          | Missense             | SNP          | 1          | 1:g.11852412G>A | ENST00000376590.3:c.1555C>T | 10   | rs45496998   |
| P395S          | Missense             | SNP          | 1          | 1:g.11854579G>A | ENST00000376590.3:c.1183C>T | 8    | rs1298093435 |
| R41Q           | Missense             | SNP          | 1          | 1:g.11863052C>T | ENST00000376590.3:c.122G>A  | 2    | rs775972969  |
| A175T          | Missense             | SNP          | 1          | 1:g.11860332C>T | ENST00000376590.3:c.523G>A  | 4    | rs1182635980 |
| V93G           | Missense             | SNP          | 1          | 1:g.11861415A>C | ENST00000376590.3:c.278T>G  | 3    |              |
| V93L           | Missense             | SNP          | 1          | 1:g.11861416C>A | ENST00000376590.3:c.277G>T  | 3    |              |
| D495N          | Missense             | SNP          | 1          | 1:g.11854011C>T | ENST00000376590.3:c.1483G>A | 9    | rs749165790  |
| R335C          | Missense             | SNP          | 1          | 1:g.11855183G>A | ENST00000376590.3:c.1003C>T | 6    | rs748289202  |
| G298D          | Missense             | SNP          | 1          | 1:g.11855293C>T | ENST00000376590.3:c.893G>A  | 6    |              |
| A368S          | Missense             | SNP          | 1          | 1:g.11854850C>A | ENST00000376590.3:c.1102G>T | 7    |              |
| H263Q          | Missense             | SNP          | 1          | 1:g.11855397G>T | ENST00000376590.3:c.789C>A  | 6    |              |
| G490R          | Missense             | SNP          | 1          | 1:g.11854026C>T | ENST00000376590.3:c.1468G>A | 9    | rs760349899  |
| V176A          | Missense             | SNP          | 1          | 1:g.11860328A>G | ENST00000376590.3:c.527T>C  | 4    |              |
| L148R          | Missense             | SNP          | 1          | 1:g.11861250A>C | ENST00000376590.3:c.443T>G  | 3    |              |
| R357H          | Missense             | SNP          | 1          | 1:g.11854882C>T | ENST00000376590.3:c.1070G>A | 7    | rs977038830  |
| R51Q           | Missense             | SNP          | 1          | 1:g.11863022C>T | ENST00000376590.3:c.152G>A  | 2    | rs201618781  |
| L229P          | Missense             | SNP          | 1          | 1:g.11856357A>G | ENST00000376590.3:c.686T>C  | 5    | rs1362436529 |
| R183Q          | Missense             | SNP          | 1          | 1:g.11860307C>T | ENST00000376590.3:c.548G>A  | 4    | rs574132670  |
| R358*          | Nonsense             | SNP          | 1          | 1:g.11854880G>A | ENST00000376590.3:c.1072C>T | 7    | rs377443637  |
| E40K           | Missense             | SNP          | 1          | 1:g.11863056C>T | ENST00000376590.3:c.118G>A  | 2    |              |
| R51W           | Missense             | SNP          | 1          | 1:g.11863023G>A | ENST00000376590.3:c.151C>T  | 2    | rs764131110  |
| R238C          | Missense             | SNP          | 1          | 1:g.11856331G>A | ENST00000376590.3:c.712C>T  | 5    | rs377571071  |
| G504R          | Missense             | SNP          | 1          | 1:g.11853984C>T | ENST00000376590.3:c.1510G>A | 9    | rs1373785177 |
| L621P          | Missense             | SNP          | 1          | 1:g.11850846A>G | ENST00000376590.3:c.1862T>C | 12   |              |
| Q634*          | Nonsense             | SNP          | 1          | 1:g.11850808G>A | ENST00000376590.3:c.1900C>T | 12   |              |
| L347I          | Missense             | SNP          | 1          | 1:g.11854913G>T | ENST00000376590.3:c.1039C>A | 7    |              |
| E185D          | Missense             | SNP          | 1          | 1:g.11860300C>A | ENST00000376590.3:c.555G>T  | 4    |              |
| T653M          | Missense             | SNP          | 1          | 1:g.11850750G>A | ENST00000376590.3:c.1958C>T | 12   | rs35737219   |



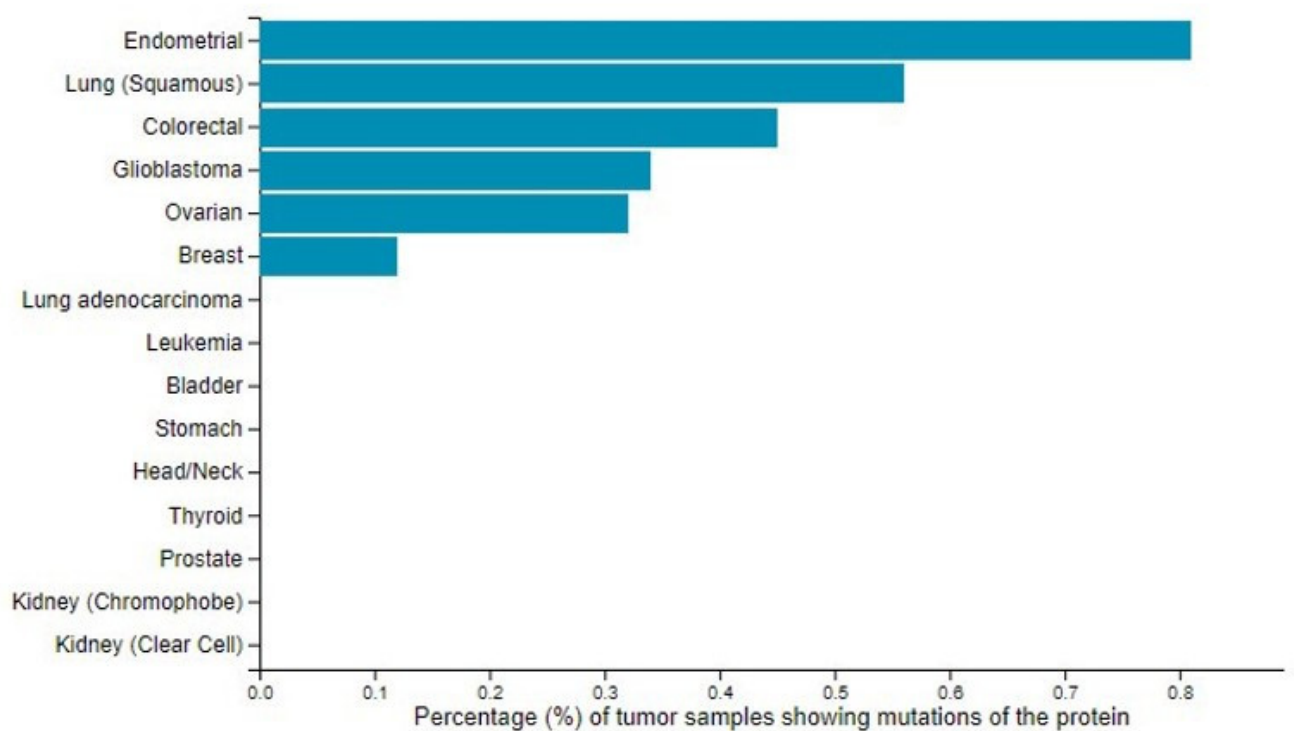

**Figure S7.** Protein mutation frequency in cytidine deaminase (CDA) in 4440 TCGA tumor samples from 15 cancer types. (source: <https://www.phosphosite.org/proteinAction.action?id=1911500&showAllSites=true>).

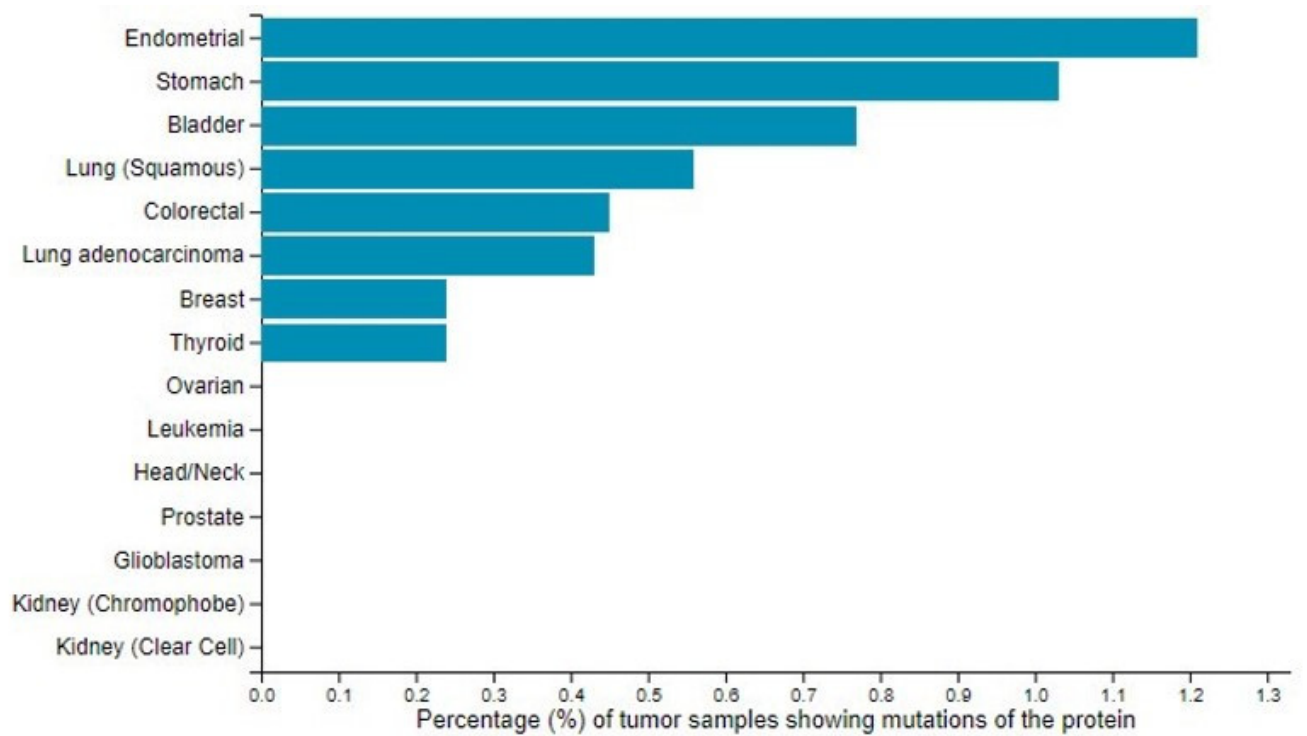

**Figure S8.** Protein mutation frequency in thymidine phosphorylase (TP) in 4440 TCGA tumor samples from 15 cancer types (source: <https://www.phosphosite.org/proteinAction.action?id=1290138&showAllSites=true>).

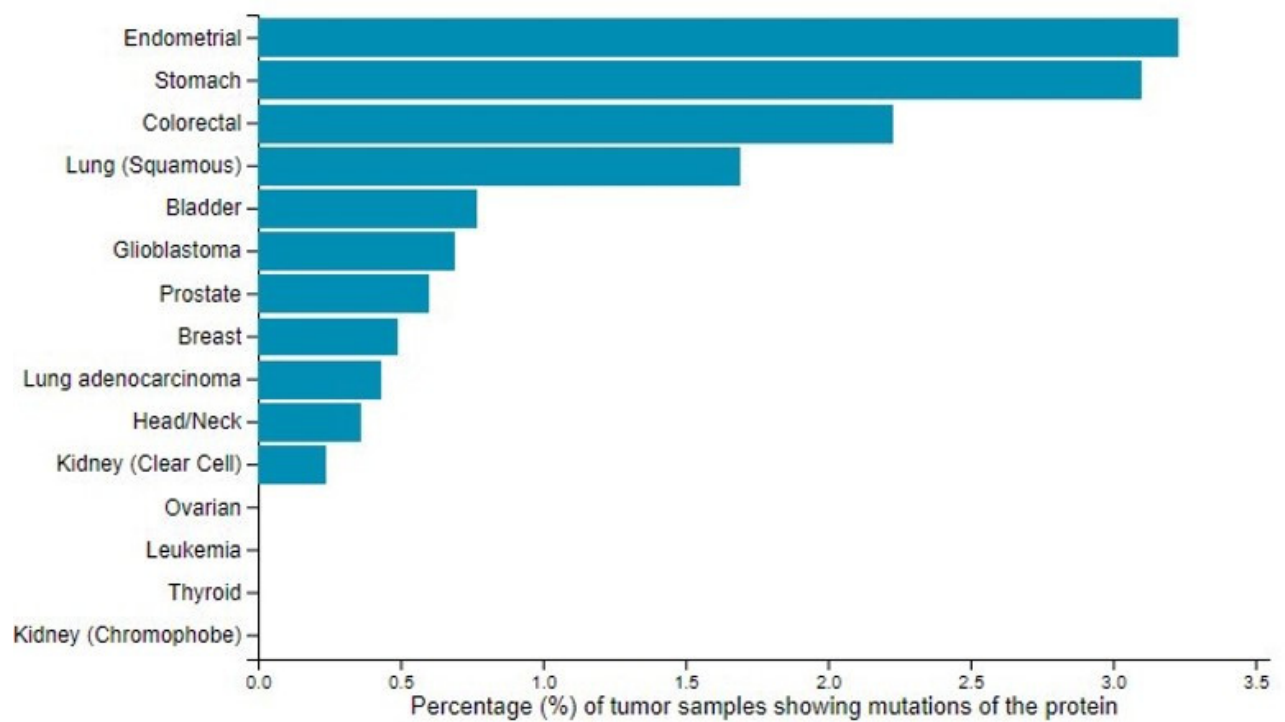

**Figure S9.** Protein mutation frequency in 5,10-methylenetetrahydrofolate reductase (MTHFR) in 4440 TCGA tumor samples from 15 cancer types (source: <https://www.phosphosite.org/proteinAction.action?id=7717&showAllSites=true>).
